# Supplementary material for: Integrating Full-Length and Second-Generation Transcriptomics to Reveal Differentially Expressed Genes Associated with the Development of Corydalis yanhusuo Tuber
Source: MDPI journal article supplement (doi:10.3390/life13112207), 2023-11-14
Supplement: s1 [file s1]

Table S2 Primers for qRT-PCR validation of selected genes.

| Gene code    | Gene ID          | Primer sequence                                          |
|--------------|------------------|----------------------------------------------------------|
| <i>actin</i> | AT1G49240        | F: GGTAACATTGTGCTCAGTGGTGG<br>R: AACGACCTTAATCTTCATGCTGC |
| 1            | transcript_14664 | F: GCCCTGAAGTTGTTTCTTGTGCT<br>R: TGCACGGCTTCTCCTTCCAT    |
| 2            | transcript_33342 | F: ACGTGAACCATGCTGCGGA<br>R: CCTCTGCCCTTTGTTCCGAGT       |
| 3            | transcript_24801 | F: GCCATGGTCACCCTCTTCGA<br>R: TGCTTGGGTATGCTGCTCGA       |
| 4            | transcript_10739 | F: ATGAGAGCTCCTCCCATGGC<br>R: TGTTGAGAGCCCATGTTGTTGA     |
| 5            | transcript_10085 | F: AGCGGCACCTTCTCACAAGT<br>R: CACGTCTCACTCCCAACCGT       |
| 6            | transcript_18936 | F: TCCCGTCTCATTTCCACCCG<br>R: CACGTTCCCTTTGCTTGACGGT     |
| 7            | transcript_593   | F: GGCGACAAGACCATTGCGTT<br>R: CCCTCACCTCCCAATGCCAT       |
| 8            | transcript_10565 | F: GGGAGCATGTAAAGGAGCCG<br>R: AGAGAAGCAGAGCACAGCGT       |
